# Supplementary material
Source: PubMed Central journal article supplement (PMC5876028)
Supplement: NIHMS950166-supplement-supplement_1.pdf [file NIHMS950166-supplement-supplement_1.pdf]

**Supplemental Table 1.** Variables Included in the Propensity Score Model.

| Variables                                                                                                                   |
|-----------------------------------------------------------------------------------------------------------------------------|
| Demographics                                                                                                                |
| Age (in years)                                                                                                              |
| Race/ethnicity                                                                                                              |
| Marital status                                                                                                              |
| Clinical Factors                                                                                                            |
| Cancer                                                                                                                      |
| Dementia                                                                                                                    |
| Depression                                                                                                                  |
| Diabetes mellitus                                                                                                           |
| Heart failure                                                                                                               |
| HIV                                                                                                                         |
| Ischemic stroke                                                                                                             |
| Liver disease, mild                                                                                                         |
| Liver disease, moderate or severe                                                                                           |
| Lung disease                                                                                                                |
| Metastatic cancer                                                                                                           |
| Myocardial infarction                                                                                                       |
| Osteoarthritis or rheumatoid arthritis                                                                                      |
| Paralysis                                                                                                                   |
| Peptic ulcer disease                                                                                                        |
| Peripheral vascular disease                                                                                                 |
| Renal disease                                                                                                               |
| Substance use disorder                                                                                                      |
| Body mass index                                                                                                             |
| Body mass index squared                                                                                                     |
| Body weight status (normal/underweight; overweight; obese)                                                                  |
| Healthcare Utilization                                                                                                      |
| Number of patient's primary care visits and specialty care visits                                                           |
| Number of patient's 'other care' visits (in quartiles) [VA visits not including primary care, specialty care, or lab tests] |
| Interaction between 'other care' visits (in quartiles) and BMI                                                              |
| Number of hospital admission                                                                                                |
| Number of hospital discharges                                                                                               |
| Total number of days hospitalized (per year)                                                                                |
| Residential Environmental Attributes                                                                                        |
| Urbanicity (large central metro; large fringe metro; medium metro; small metro; micropolitan; non-core)                     |
| Poverty rate, census tract                                                                                                  |
| Poverty rate squared, census tract                                                                                          |
| Poverty rate quartiles, census tract                                                                                        |
| Population density deciles, census tract                                                                                    |
| Population density, census tract                                                                                            |
| Population density squared, census tract                                                                                    |
| Population density quartiles, census tract                                                                                  |
| Population density deciles, census tract                                                                                    |
| Median household income, census tract                                                                                       |
| Median household income squared, census tract                                                                               |
| Median household income quartiles, census tract                                                                             |
| Median household income deciles, census tract                                                                               |
| Grocery store count, 1 mile                                                                                                 |
| Grocery store binary, 1 mile                                                                                                |
| Grocery store count, 3 miles                                                                                                |
| Grocery store quartiles, 3 miles                                                                                            |

Chain supermarket count, 1 mile  
Chain supermarket binary, 1 mile  
Chain supermarket count, 3 miles  
Chain supermarket quartiles, 3 miles  
Non-chain supermarket count, 1 mile  
Non-chain supermarket binary, 1 mile  
Non-chain supermarket count, 3 miles  
Non-chain supermarket quartiles, 3 miles  
Fast food restaurant count, 1 mile  
Fast food restaurant quartiles, 1 mile  
Chain fast food restaurant count, 1 mile  
Chain fast food restaurant categorical, 1 mile  
Chain fast food restaurant count, 3 miles  
Chain fast food restaurant quartiles, 3 miles  
Non-chain fast food restaurant count, 1 mile  
Non-chain fast food restaurant categorical, 1 mile  
Non-chain fast food restaurant count, 3 miles  
Non-chain fast food restaurant quartiles, 3 miles  
Convenience store count, 1 mile  
Convenience store binary, 1 mile  
Convenience store count, 3 miles  
Convenience store quartiles, 3 miles  
Fitness facility count, 1 mile  
Fitness facility tertiles, 1 mile  
Fitness facility count, 3 miles  
Fitness facility tertiles, 3 miles  
Park area, 0.25 mile  
Park area tertiles, 0.25 mile  
Park area, 1 mile  
Park area tertiles, 1 mile  
Density of commercial walking destinations, 1 mile  
Density of commercial walking destinations quartiles, 1 mile  
Distance to closest VA outpatient facility (in meters)  
Distance to second closest VA outpatient facility (in meters)

#### VA Medical Care Facility Characteristics

VA facility complexity rating  
Proportion of patients with arthritis at each VA facility  
Proportion of patients with cancer at each VA facility  
Proportion of patients with dementia at each VA facility  
Proportion of patients with depression at each VA facility  
Proportion of patients with diabetes (with complications) at each VA facility  
Proportion of patients with diabetes (without complications) at each VA facility  
Proportion of patients with heart failure at each VA facility  
Proportion of patients with HIV at each VA facility  
Proportion of patients with stroke or cardiovascular disease at each VA facility  
Proportion of patients with mild liver disease at each VA facility  
Proportion of patients with moderate or severe liver disease at each VA facility  
Proportion of patients with lung disease at each VA facility  
Proportion of patients with metastatic cancer at each VA facility  
Proportion of patients who had a myocardial infarction at each VA facility  
Proportion of patients with a peptic ulcer at each VA facility  
Proportion of patients with renal disease at each VA facility  
Proportion of patients with substance use disorder at each VA facility  
Proportion of patients who are obese at each VA facility  
Proportion of patients who are overweight at each VA facility  
Percentage of patients enrolled in the MOVE! program at each VA facility

Proportion of women patients at each VA facility  
Proportion of non-Hispanic white patients at each VA facility  
Proportion of non-Hispanic black patients at each VA facility  
Proportion of 'other' race patients at each VA facility  
Proportion of unknown race patients at each VA facility  
Proportion of Hispanic patients at each VA facility  
Proportion of patients aged 20-29 at each VA facility  
Proportion of patients aged 30-39 at each VA facility  
Proportion of patients aged 40-49 at each VA facility  
Proportion of patients aged 50-59 at each VA facility  
Proportion of patients aged 60-69 at each VA facility  
Proportion of patients aged 70-85 at each VA facility  
Average census tract median household income at each VA facility  
Average census tract population density at each VA facility  
Average census tract poverty rate at each VA facility  
Average number of chain fast food restaurants within 1 mile at each VA facility  
Average number of chain fast food restaurants within 3 miles at each VA facility  
Average number of chain supermarkets within 1 mile at each VA facility  
Average number of chain supermarkets within 3 miles at each VA facility  
Average number of convenience stores within 1 mile at each VA facility  
Average number of convenience stores within 3 miles at each VA facility

Other

Patient's index year [2009, 2010, 2011, 2012, 2013, or 2014]

---
